# Supplementary material
Source: publisher figshare collection journal article supplement (https://frontiersin.figshare.com/ndownloader/files/13077644)
Supplement: Supplementary file [file 13077644]

## **Supporting Information**

### **Glibenclamide reduces primary human monocyte functions against tuberculosis infection by enhancing M2 polarization**

Chidchamai Kewcharoenwong<sup>1,2</sup>, Satria A. Prabowo<sup>3,4</sup>, Gregory J. Bancroft<sup>3,4</sup>, Helen A. Fletcher<sup>3,4\*</sup> and Ganjana Lertmemongkolchai<sup>1,2\*</sup>

<sup>1</sup>Mekong Health Science Research Institute and <sup>2</sup>Centre for Research and Development of Medical Diagnostic Laboratories, Faculty of Associated Medical Sciences, Khon Kaen University, Thailand, <sup>3</sup>Department of Immunology and Infection, Faculty of Infectious and Tropical Diseases, London School of Hygiene and Tropical Medicine, UK, <sup>4</sup>Tuberculosis Centre, London School of Hygiene and Tropical Medicine, UK.

\*Corresponding authors

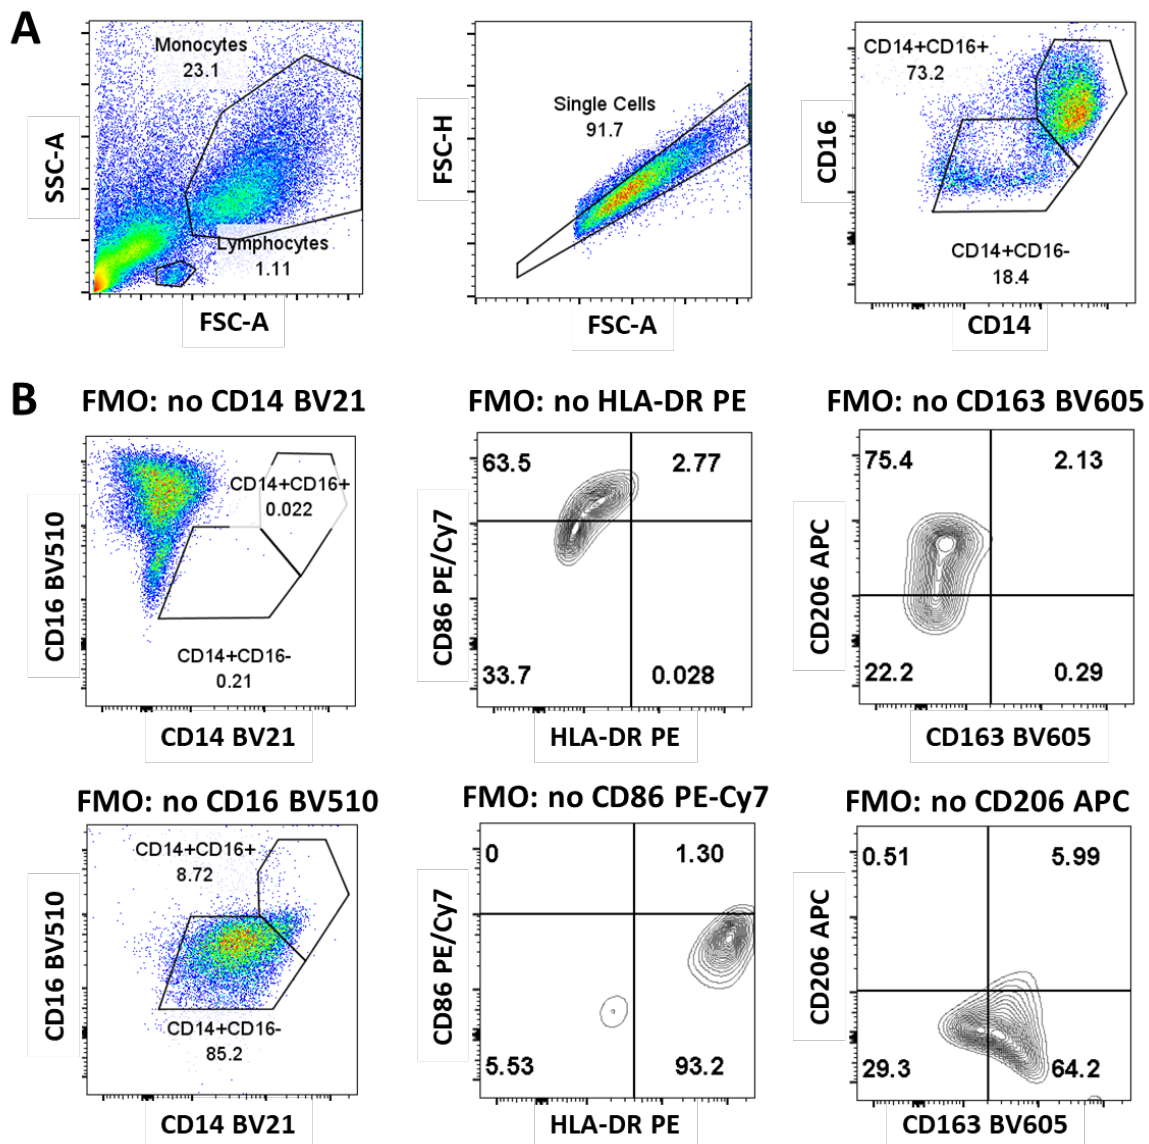

**Figure S1: Gating strategy and Fluorescence minus one (FMO) controls.**

(A) Total monocyte population from UK healthy individual was gated and then detected as CD14<sup>+</sup>CD16<sup>-</sup> and CD14<sup>hi</sup>CD16<sup>+</sup> populations. Each population was further analyzed for M1, HLA-DR<sup>+</sup>CD86<sup>+</sup> or M2, CD163<sup>+</sup>CD206<sup>+</sup> expression. (B) 5% contour plots with outliers show how a FMO control (left panel) was used to identify stained cells in the fully stained sample (Fig 1A). There were CD14 BV21, CD16 BV510, HLA-DR PE, CD86 PE-Cy7, CD163 BV605 and CD206 APC FMO.

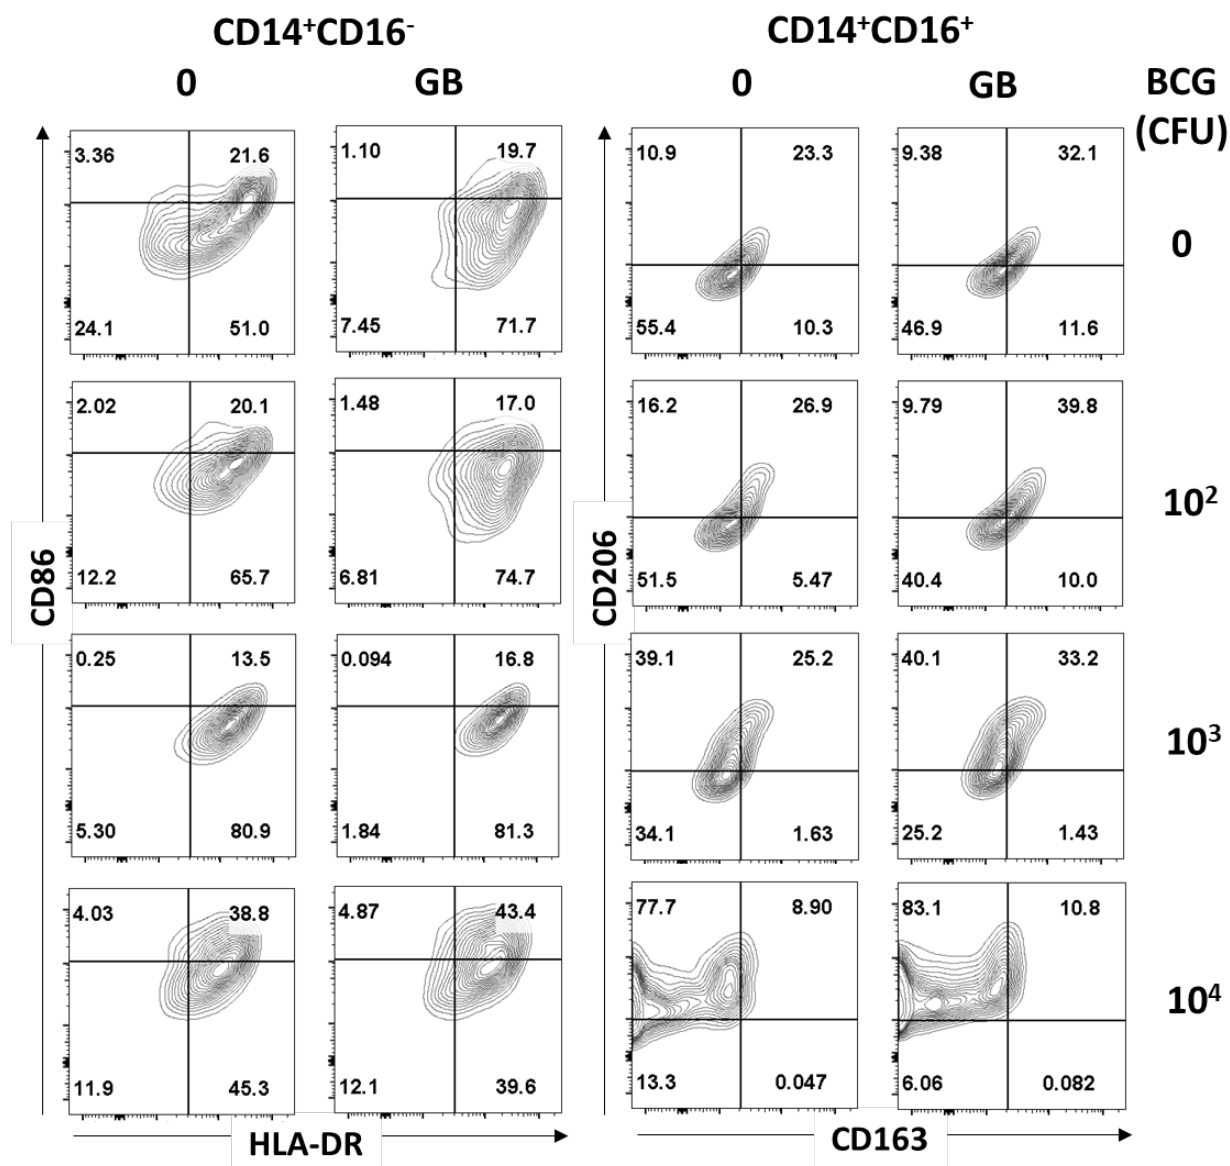

**Figure S2: M1 and M2 marker expression in response to varied concentrations of BCG.**

Monocytes from UK healthy individuals (n=10) were treated with glibenclamide (GB, 25  $\mu$ M) or vehicle (0) for 30 min., incubated with 10<sup>2</sup>, 10<sup>3</sup> or 10<sup>4</sup> CFU of BCG or RPMI medium (Med) for 96 h and then analysed for M1 (HLA-DR<sup>+</sup>CD86<sup>+</sup>) or M2 (CD163<sup>+</sup>CD206<sup>+</sup>) expression by flow cytometry.

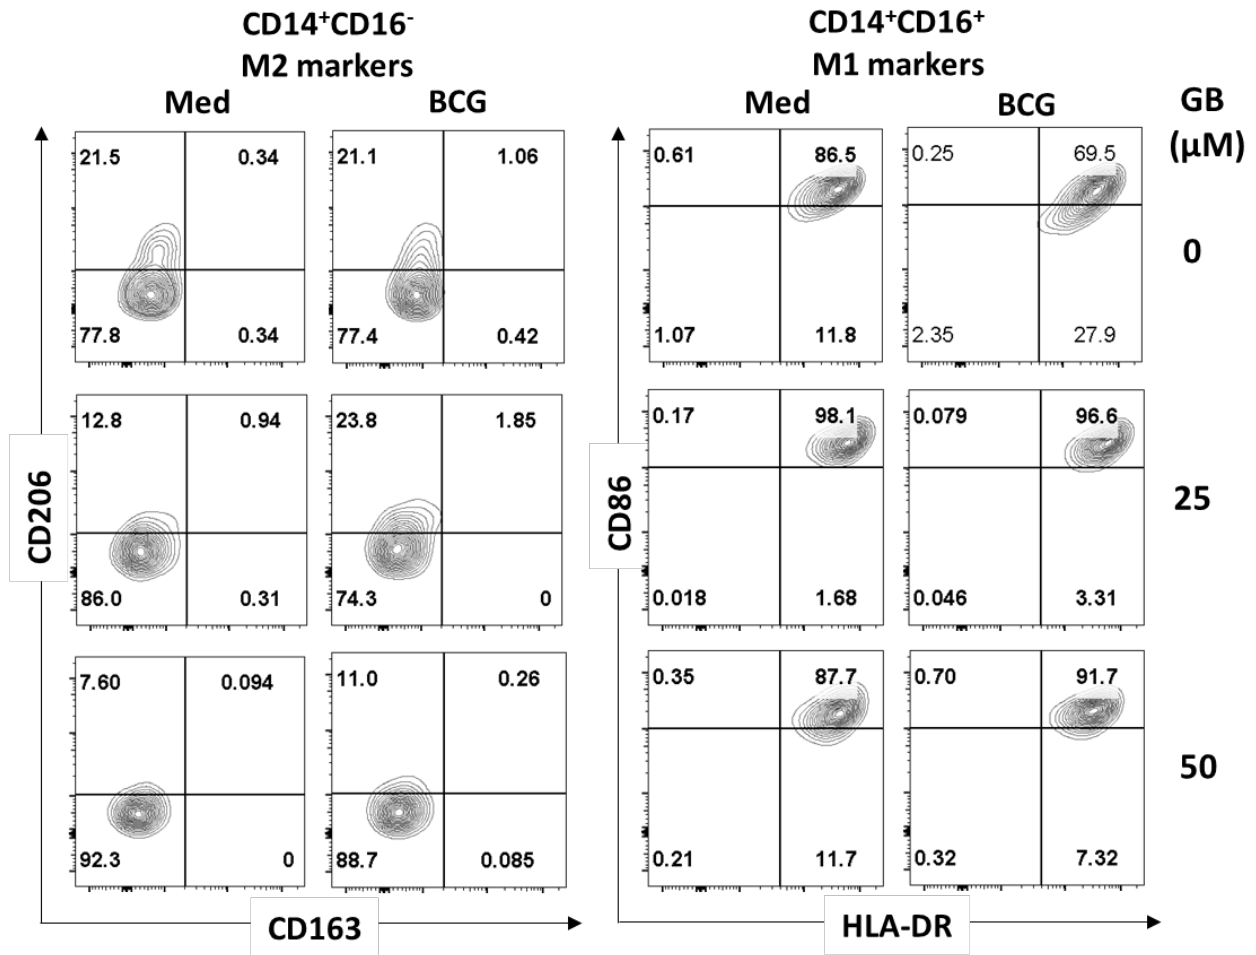

**Figure S3: Effect of glibenclamide on M2 markers of CD14<sup>+</sup>CD16<sup>-</sup> population and M1 markers of CD14<sup>+</sup>CD16<sup>+</sup> population.**

Monocytes from UK healthy individuals (n=10) were treated with glibenclamide (GB, 0, 25, 50 μM) for 30 min., incubated with 100 CFU per well of BCG or RPMI medium (Med) for 96 h and then analysed for M1 and M2 markers by flow cytometry. After exclusion of debris and doublets, monocytes were detected as CD14<sup>+</sup>CD16<sup>-</sup> and CD14<sup>+</sup>CD16<sup>+</sup> populations and then further analysed for M2, CD163<sup>+</sup>CD206<sup>+</sup> and M1, HLA-DR<sup>+</sup>CD86<sup>+</sup> expression, respectively.

**A**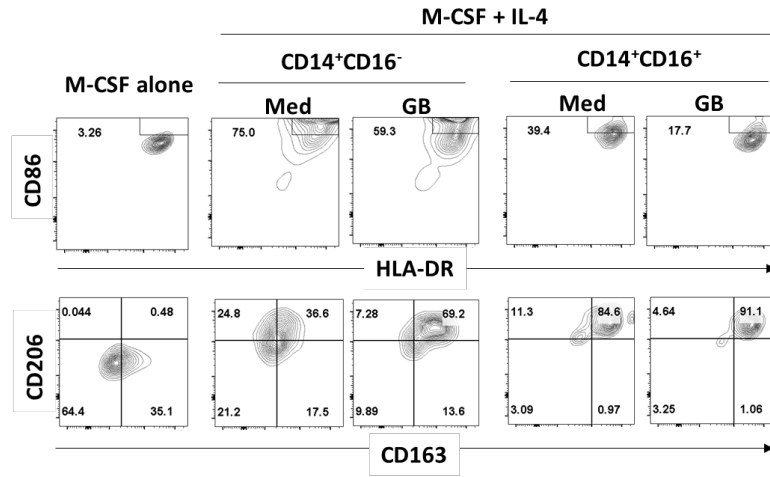**B**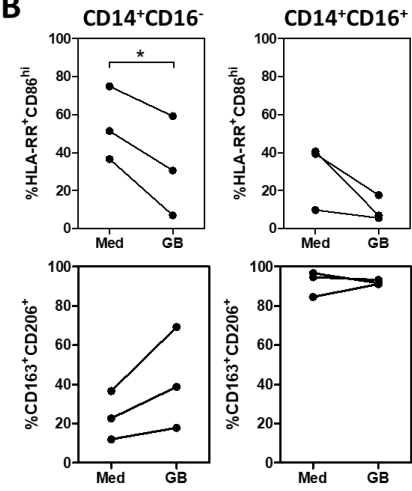

**Figure S4: Glibenclamide reduces M1 markers of CD14<sup>+</sup>CD16<sup>-</sup> population in M2 polarized macrophages.**

(A) Monocytes from UK healthy donors (n=3) were treated with 50 ng/ml monocyte-colony stimulating factor (M-CSF) for M2 differentiation. At day 5, monocyte-derived macrophages (MDM) were stimulated for 2 days with 20 ng/ml IL-4 to obtain M2 phenotypes and then analysed M1 and M2 markers by flow cytometry. (B) The percentage of M1 or M2 positive cells gated on CD14<sup>+</sup>CD16<sup>-</sup> and CD14<sup>+</sup>CD16<sup>+</sup> cells are shown. Each dot represents median with interquartile range. Statistical analysis was performed using Paired *t* test to compare between with and without GB (w/o), \**P* < 0.05. No asterisk, non significant.

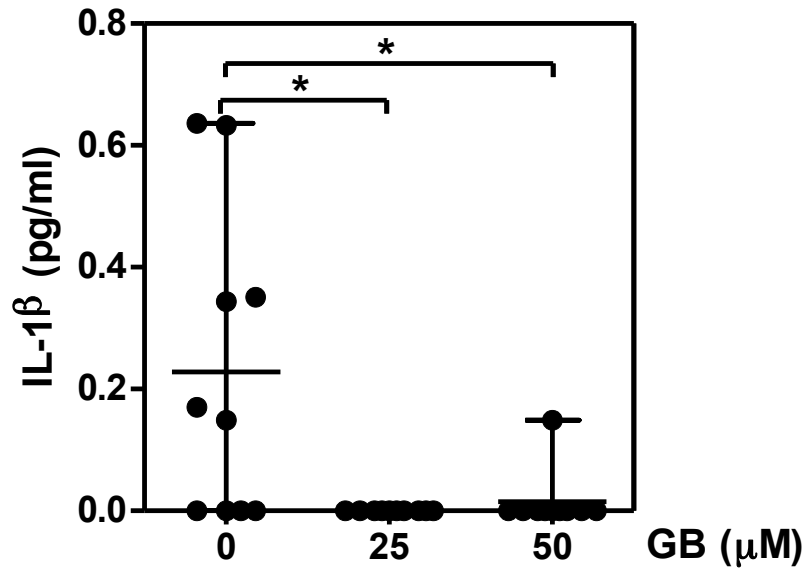

High sensitivity IL-1 $\beta$  ELISA: 0.125 - 8  $\mu$ g/ml

**Figure S5: Glibenclamide reduces IL-1 $\beta$  from primary human monocytes in response to BCG.**

Monocytes from UK healthy individuals were treated with glibenclamide (GB, 25, 50  $\mu$ M) for 30 min. Drug-treated monocytes were incubated with  $10^2$  CFU per well of BCG (n=10) for 96 h and then the supernatants were collected for IL-1 $\beta$  detection. Error bars represent. Statistical analysis was performed using One Way ANOVA. Data are expressed as median with interquartile range. \* $P < 0.05$ . No asterisk, non significant.
